# Supplementary material for: Compatibility of a Silicone Impression/Adhesive System to FDM-Printed Tray Materials—A Laboratory Peel-off Study
Source: PubMed Central journal article supplement (PMC6213137; doi:10.3390/ma11101905), 2018-10-07
Supplement: materials-11-01905-s001.pdf [file materials-11-01905-s001.pdf]

**Table S1.** Two-way ANOVA of Sa.

| Source                   | Type III Sum of Squares | df | Mean Square | F        | Sig.    | Partial Eta Squared |
|--------------------------|-------------------------|----|-------------|----------|---------|---------------------|
| Corrected Model          | 1291.682 <sup>a</sup>   | 7  | 184.526     | 202.119  | < 0.001 | 0.989               |
| gritblasting             | 1017.513                | 1  | 1017.513    | 1114.523 | < 0.001 | 0.986               |
| materials                | 142.492                 | 3  | 47.497      | 52.026   | < 0.001 | 0.907               |
| gritblasting * materials | 131.677                 | 3  | 43.892      | 48.077   | < 0.001 | 0.900               |
| Error                    | 14.607                  | 16 | 0.913       |          |         |                     |
| Total                    | 8151.806                | 24 |             |          |         |                     |
| Corrected Total          | 1306.289                | 23 |             |          |         |                     |

<sup>a</sup>. R Squared = 0.989 (Adjusted R Squared = 0.984)

**Table S2.** Two-way ANOVA of Svi.

| Source                   | Type III Sum of Squares | df | Mean Square | F       | Sig.    | Partial Eta Squared |
|--------------------------|-------------------------|----|-------------|---------|---------|---------------------|
| Corrected Model          | 0.010 <sup>a</sup>      | 7  | 0.001       | 32.139  | < 0.001 | 0.934               |
| gritblasting             | 0.009                   | 1  | 0.009       | 211.296 | < 0.001 | 0.930               |
| materials                | 0.000                   | 3  | 1.181E-004  | 2.776   | 0.075   | 0.342               |
| gritblasting * materials | 0.000                   | 3  | 7.586E-005  | 1.783   | 0.191   | 0.251               |
| Error                    | 0.001                   | 16 | 4.254E-005  |         |         |                     |
| Total                    | 0.406                   | 24 |             |         |         |                     |
| Corrected Total          | 0.010                   | 23 |             |         |         |                     |

<sup>a</sup>. R Squared = 0.934 (Adjusted R Squared = 0.905)

**Table S3.** Normality test of peel-off strength.

|                     |           | Shapiro-Wilk |    |       |
|---------------------|-----------|--------------|----|-------|
|                     |           | Statistic    | df | Sig.  |
| Before gritblasting | ABS       | 0.768        | 11 | 0.004 |
|                     | HIPS      | 0.907        | 11 | 0.222 |
|                     | PETG      | 0.795        | 11 | 0.008 |
|                     | REFERENCE | 0.941        | 11 | 0.530 |
| After gritblasting  | ABS       | 0.905        | 11 | 0.213 |
|                     | HIPS      | 0.932        | 11 | 0.427 |
|                     | PETG      | 0.966        | 11 | 0.839 |
|                     | REFERENCE | 0.920        | 11 | 0.315 |

**Table S4.** Scheirer-Ray-Hare test of line peel-off strength.

|                       | Sum of Squares | df | Mean Square | H      | Sig.      |
|-----------------------|----------------|----|-------------|--------|-----------|
| Material              | 1074           | 3  | 358         | 1.645  | 0.649     |
| Gritblasting          | 18271          | 1  | 18271       | 27.994 | 1.217E-07 |
| Material*Gritblasting | 1352           | 3  | 451         | 2.072  | 0.558     |
| Residuals             | 36085          | 80 | 451         |        |           |
